# Supplementary material for: N- and O-doped hollow carbons constructed by self- and extrinsic activation for the oxygen reduction reaction and flexible zinc–air Batteries
Source: Royal Society of Chemistry journal article supplement (doi:10.1039/d1nr04821j), 2021-01-01
Supplement: d1nr04821j2.pdf [file d1nr04821j2.pdf]

## Supporting Information

### **N- and O-doped Hollow Carbons Constructed by Self- and Extrinsic-activation for Oxygen Reduction Reaction and Flexible Zinc-Air batteries**

Qianjie Xie,<sup>a, b</sup> Wenfang Si,<sup>b</sup> Yehua Shen,<sup>\*b</sup> Zheng Wang,<sup>\*a</sup> Hirosh Uyama<sup>b, c</sup>

*<sup>a</sup>College of Food Science and Engineering, Northwest University, No. 229 Taibai North Road, 710069 Xi'an, Shaanxi, China.*

*<sup>b</sup>Key Laboratory of Synthetic and Natural Functional Molecule Chemistry of Ministry of Education, College of Chemistry and Materials Science, Northwest University, No. 1, Xuefu Road, 710127 Xi'an, Shaanxi, China.*

*<sup>c</sup>Department of Applied Chemistry, Graduate School of Engineering, Osaka University, Suita 565-0871, Japan.*

Corresponding author: zheng.wang@nwu.edu.cn, yhshen@nwu.edu.cn

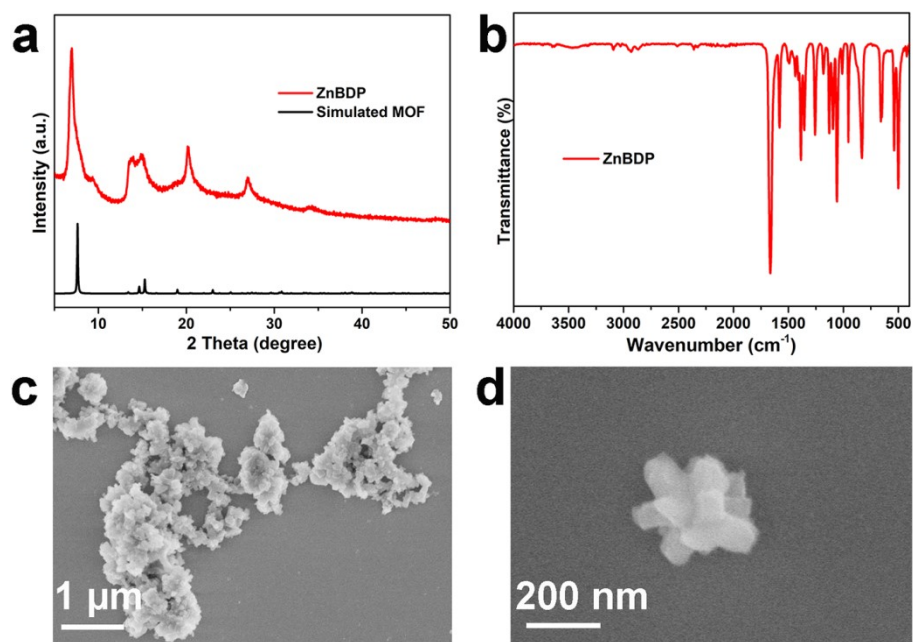

**Figure S1.** (a) The X-ray diffraction (XRD) patterns, (b) Fourier transformation infrared (FT-IR) spectrum, (c–d) scanning electron microscopy (SEM) images of ZnBDP (BDP = 1,4-(4-bispyrazolyl)benzene).

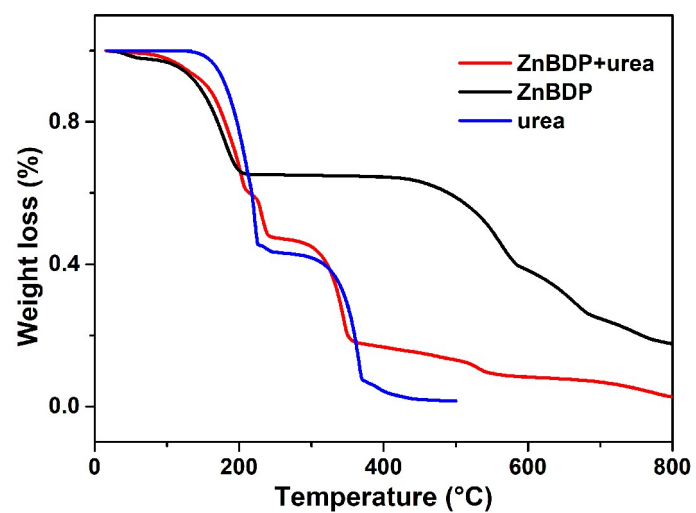

**Figure S2.** The TG of ZnBDP, urea, and the mixture of ZnBDP and urea (1 : 3 by weight).

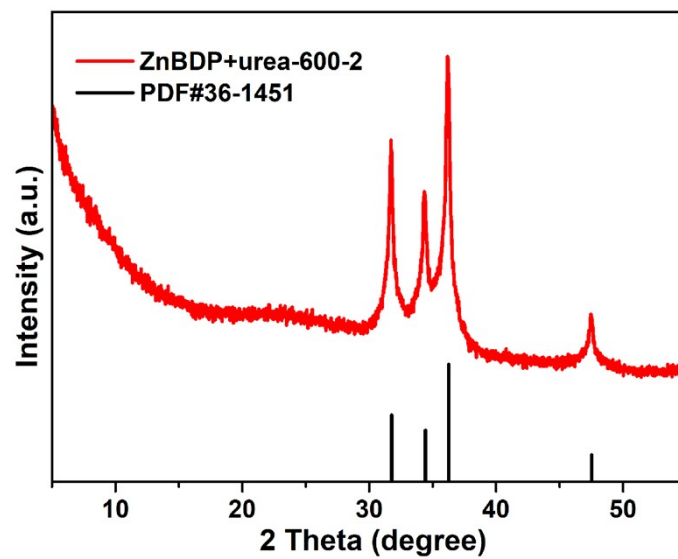

**Figure S3.** The XRD pattern of the mixture of ZnBDP (1 : 3 by weight) pyrolyzed under Ar flow at 600 °C for 1 h. As shown, the Zn was transformed into ZnO during pyrolysis.

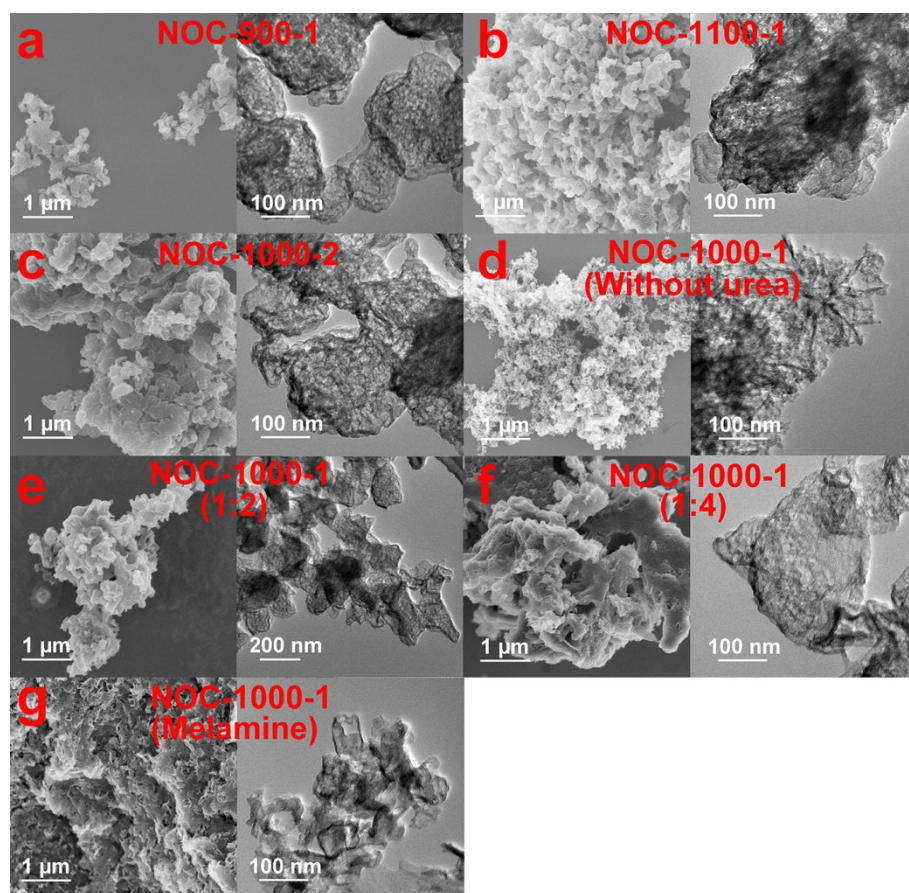

**Figure S4.** The SEM images and TEM images of derived carbon catalysts under different conditions. Viewing from the images, it is apparent that the presence of sacrificial extrinsic activator was of great significance for the formation of hollow carbons.

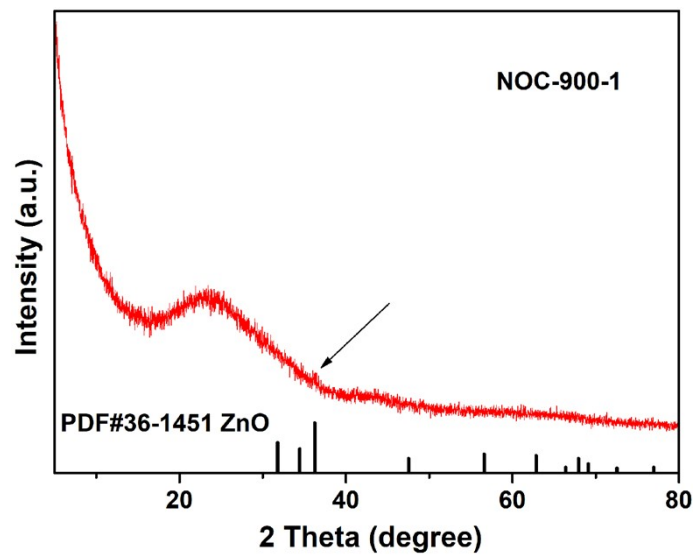

**Figure S5.** The XRD patterns of NOC-900-1. Herein, an additional peak located at  $36.3^\circ$  could assign to the (101) of ZnO.

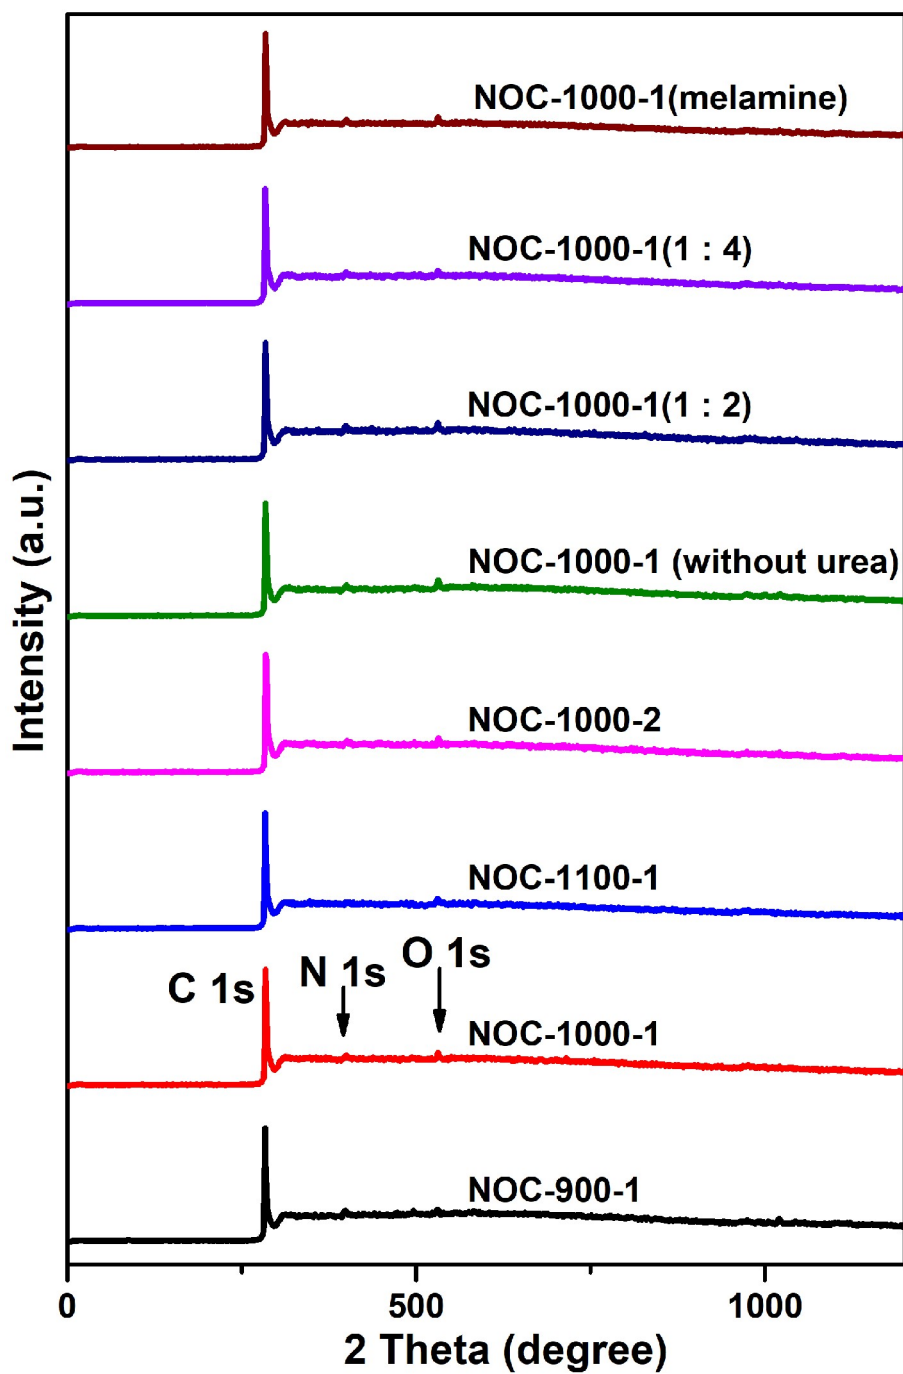

**Figure S6.** The full XPS spectra of the derived carbon catalysts pyrolyzed under different conditions.



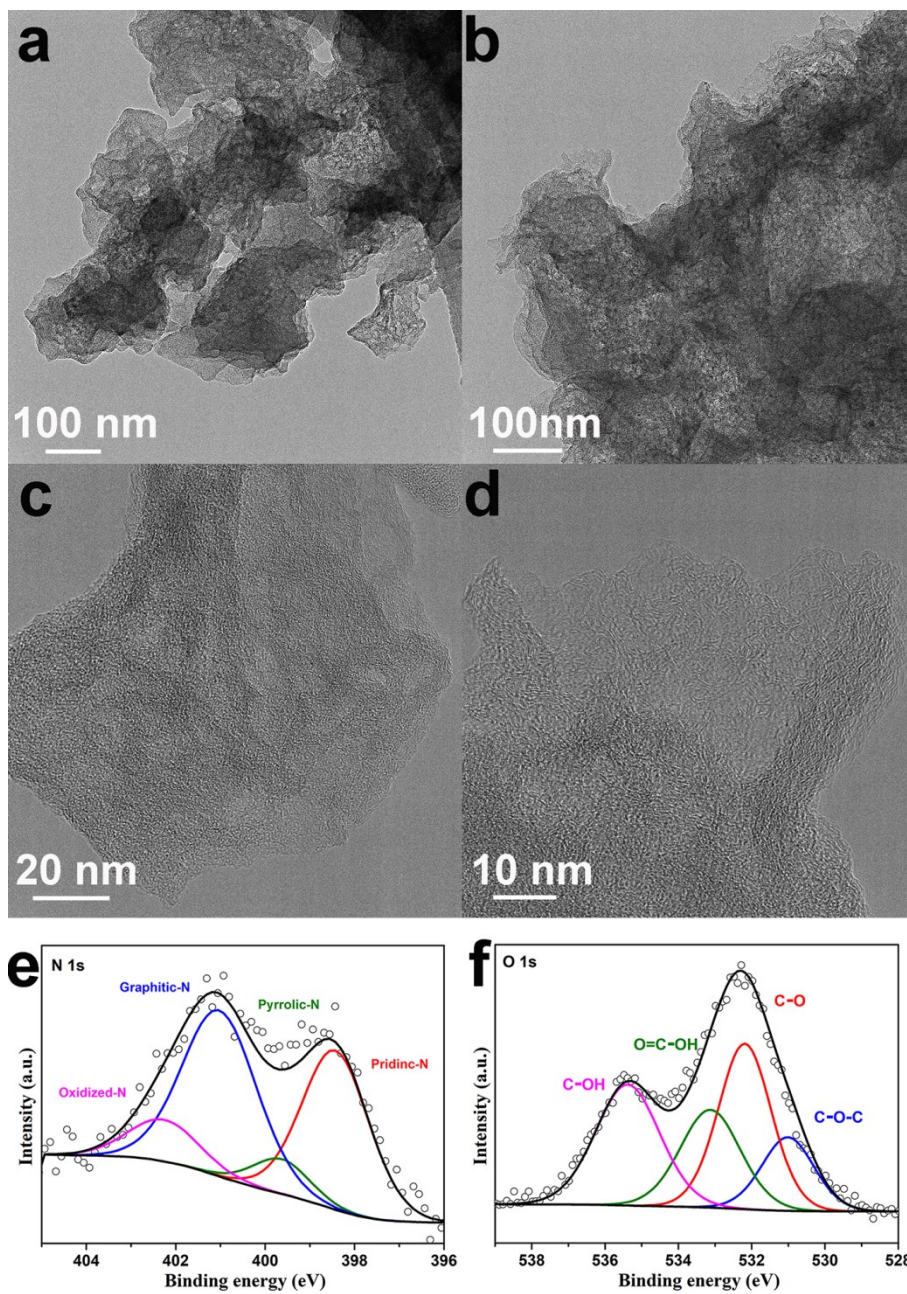

**Figure S7.** The ORR polarization curve and the corresponding ring current of (a) 20 wt% Pt/C and (b) NOC-1000-1 recorded on the RRDE.



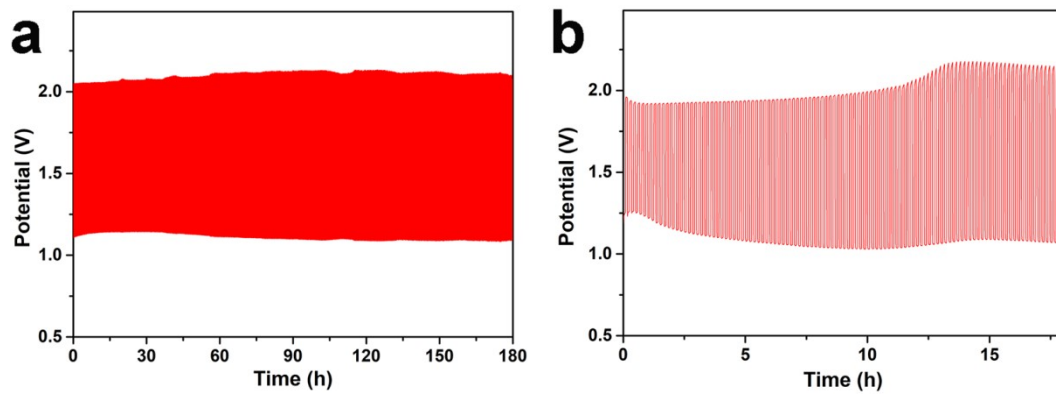

**Figure S8.** Cycling performance of rechargeable Zn-air batteries with the (a) NC+RuO<sub>2</sub> and (b) 20 wt% Pt/C+RuO<sub>2</sub> cathodes at 5 mA cm<sup>-2</sup>.

**Table S1.** The relative content of pyridinic N, pyrrolic N, graphitic N and oxidized N in the derived carbon catalysts.

| <b>Content</b>                   | <b>Pyridinic N</b> | <b>Pyrrolic N</b> | <b>Graphitic N</b> | <b>Oxidized N</b> | <b>Pyridinic N + Graphitic N</b> |
|----------------------------------|--------------------|-------------------|--------------------|-------------------|----------------------------------|
| <b>NOC-900-1</b>                 | 46.04              | 7.56              | 39.36              | 7.05              | 85.4                             |
| <b>NOC-1000-1</b>                | 37.49              | 7.13              | 44.81              | 10.57             | 82.3                             |
| <b>NOC-1100-1</b>                | 16.39              | 5.29              | 62.11              | 16.21             | 78.5                             |
| <b>NOC-1000-2</b>                | 24.65              | 5.02              | 54.44              | 15.89             | 79.09                            |
| <b>NOC-1000-1 (without urea)</b> | 32.27              | 9.97              | 42.32              | 15.44             | 74.59                            |
| <b>NOC-1000-1(1:2)</b>           | 32.62              | 12.12             | 42.52              | 12.74             | 75.14                            |
| <b>NOC-1000-1(1:4)</b>           | 30.73              | 7.73              | 46.63              | 14.91             | 77.36                            |
| <b>NOC-1000-1 (melamine)</b>     | 27.46              | 7.72              | 54.14              | 10.68             | 81.6                             |

**Table S2.** Comparison of recently reported metal-free carbon catalysts for ORR in 0.1

M KOH electrolyte.

| Catalyst                           | Heteroatom | E <sub>onset</sub><br>(V<br>vs.RHE) | E <sub>1/2</sub><br>(V<br>vs.RHE) | OCV<br>(V) | Peak power density<br>of NOC-1000-1<br>(mW cm <sup>-2</sup> ) | Peak power density<br>of 20 wt%<br>Pt/C+RuO <sub>2</sub> or IrO <sub>2</sub> (<br>mW cm <sup>-2</sup> ) | Durability           | Ref.         |
|------------------------------------|------------|-------------------------------------|-----------------------------------|------------|---------------------------------------------------------------|---------------------------------------------------------------------------------------------------------|----------------------|--------------|
| NC-1000-1                          | N          | 0.977                               | 0.867                             | 1.63       | 140.55                                                        | 105.69                                                                                                  | 180h/108<br>0 cycles | This<br>work |
| PANRGO-<br>700                     | N          | /                                   | 0.864                             | /          | 116.6                                                         | 120.3                                                                                                   | /                    | [1]          |
| CMD-900-4                          | N, P       | 0.93                                | 0.85                              | /          | /                                                             | /                                                                                                       | /                    | [2]          |
| BN-PCN                             | N, B       | 0.91                                | 0.84                              | 1.387      | 193.6                                                         | 117.9                                                                                                   | 100h                 | [3]          |
| BN-<br>CDs@CNT                     | N, B       | 0.92                                | 0.8                               | /          | /                                                             | /                                                                                                       | /                    | [4]          |
| HPNC-2                             | N          | 0.96                                | 0.86                              | 1.43       | 154                                                           | 151                                                                                                     | /                    | [5]          |
| MCAC                               | N          | 0.87                                | 0.8                               | 1.383      | 139.1                                                         | /                                                                                                       | 200<br>cycles        | [6]          |
| 10N-G-800                          | N          | 0.930                               | /                                 | 1.44       | 203                                                           | 118                                                                                                     | /                    | [7]          |
| NPF-CNS-2                          | N, P, F    | 0.93                                | 0.81                              | 1.49       | 144                                                           | 112                                                                                                     | 385<br>cycles        | [8]          |
| NC-800                             | N          | /                                   | 0.85                              | /          | /                                                             | /                                                                                                       | /                    | [9]          |
| O,N-graphene                       | N, O       | 1.01                                | 0.842                             | 1.43       | 152.8                                                         | 119.8                                                                                                   | 160h                 | [10]         |
| NPF@CNF-<br>800                    | N, P, F    | 0.97                                | 0.85                              | /          | 159                                                           | 91                                                                                                      | 800<br>cycles        | [11]         |
| HPC(MV-c-<br>PN)                   | N          | 0.95                                | 0.855                             | /          | 80.1                                                          | 57.0                                                                                                    | /                    | [12]         |
| 10% F/BCN                          | N, B       | 0.92                                | 0.79                              | /          | /                                                             | /                                                                                                       | /                    | [13]         |
| N/C-N <sub>P</sub> +N <sub>G</sub> | N          | 0.98                                | 0.86                              | 1.70       | 126                                                           | 121                                                                                                     | /                    | [14]         |
| NSMPC-2                            | N, S       | 0.967                               | 0.858                             | 1.48       | 153                                                           | /                                                                                                       | 100<br>cycles        | [15]         |
| GNP-900                            | N, O, P    | 0.96                                | 0.824                             | /          | /                                                             | /                                                                                                       | /                    | [16]         |
| P,S-CNS                            | N, P, S    | 0.95                                | 0.82                              | /          | 225                                                           | /                                                                                                       | 40h                  | [17]         |
| PNC-B                              | N, P       | 0.95                                | 0.76                              | 1.33       | 91.3                                                          | 85.2                                                                                                    | /                    | [18]         |
| NHCP-1000                          | N          | 0.98                                | 0.86                              | 1.44       | 272                                                           | 265                                                                                                     | 160                  | [19]         |
| NDC-MS                             | N          | /                                   | 0.88                              | 1.495      | 174                                                           | 132                                                                                                     | 72h                  | [20]         |
| N, S@CM-<br>1000                   | N, S       | 0.9                                 | 0.76                              | 1.37       | 90                                                            | /                                                                                                       | /                    | [21]         |
| NrGO-90                            | N          | 0.82                                | 0.52                              | /          | /                                                             | /                                                                                                       | /                    | [22]         |
| N-GDY-900                          | N          | 1.01                                | 0.83                              | 1.54       | 84                                                            | /                                                                                                       | 300                  | [23]         |
| NMC-1                              | N          | 0.96                                | 0.82                              | /          | /                                                             | /                                                                                                       | /                    | [24]         |

**Table S3.** Comparison of the key parameters of flexible solid-state rechargeable ZABs from the reported literatures.

| Catalyst                                 | OCV (V) | power density of NOC-1000-1 (mW cm <sup>-2</sup> ) | power density of 20 wt% Pt/C+RuO <sub>2</sub> or IrO <sub>2</sub> (mW cm <sup>-2</sup> ) | Durability      | Ref.      |
|------------------------------------------|---------|----------------------------------------------------|------------------------------------------------------------------------------------------|-----------------|-----------|
| NC-1000-1                                | 1.48    | 100.92                                             | 72.18                                                                                    | 30 h/180 cycles | This work |
| F-ACET-500                               | /       | 52                                                 | /                                                                                        | 42 h            | [25]      |
| NPF@CNF-800                              | 1.33    | 64                                                 | 51                                                                                       | 120 cycles      | [11]      |
| N/E-HPC-900                              | 1.34    | 36.2                                               | /                                                                                        | 80 h            | [26]      |
| N, S-CC                                  | 1.247   | 47                                                 | /                                                                                        | 120 cycles      | [27]      |
| SilkNC/KB                                | /       | 32.3                                               | 26.7                                                                                     | 30 cycles       | [28]      |
| CC-AC                                    | 1.367   | 52.3                                               | /                                                                                        | 1000 min        | [29]      |
| CNT@POF                                  | 1.39    | 22.3                                               | /                                                                                        | /               | [30]      |
| FeCo/Se-CNT                              | 1.405   | 37.5                                               | /                                                                                        | 20 h/120 cycles | [31]      |
| UiO-66-NO <sub>2</sub> @CoCNT            | /       | 26                                                 | 28                                                                                       | /               | [32]      |
| FeP/Fe <sub>2</sub> O <sub>3</sub> @NPCA | 1.42    | 40.8                                               | /                                                                                        | 500 min         | [33]      |
| NC-Co/CoNx                               | 1.4     | 41.5                                               | 43.9                                                                                     | 25 h            | [34]      |
| N, S-CC                                  | 1.25    | 47                                                 | /                                                                                        | 120 cycles      | [27]      |

## Reference

- [1] H. Begum, M. S. Ahmed, S. Jung, *J. Mater. Chem. A* **2021**, *9*, 9644.
- [2] Z. Xing, R. Jin, X. Chen, B. Chen, J. Zhou, B. Tian, Y. Li, D. Fan, *Chem. Eng. J.* **2021**, *410*, 128015.
- [3] Y. Kang, W. Wang, J. Li, S. Imhanria, Y. Hao, Z. Lei, *J. Power Sources* **2021**, *493*, 229665.
- [4] Y. Pei, H. Song, Y. Liu, Y. Cheng, W. Li, Y. Chen, Y. Fan, B. Liu, S. Lu, *J. Colloid Interface Sci.* **2021**, *600*, 865.
- [5] H. Liu, G. He, X. Liu, Y. Zhu, S. Eigler, L. Han, *ChemCatChem* **2021**, *13*, 3112.
- [6] J. Liu, C. Wang, Y. Song, S. Zhang, Z. Zhang, L. He, M. Du, *J. Colloid Interface Sci.* **2021**, *591*, 253.
- [7] C. Ou, H. Chen, H. Wang, Y. Liao, R. Li, H. Liu, *Electrochim. Acta* **2021**, *380*, 138256.
- [8] Y. Zheng, H. Song, S. Chen, X. Yu, J. Zhu, J. Xu, K. A. I. Zhang, C. Zhang, T. Liu, *Small* **2020**, *16*, e2004342.
- [9] J. Meng, Z. Liu, X. Liu, W. Yang, L. Wang, Y. Li, Y.-C. Cao, X. Zhang, L. Mai, *J. Mater. Sci. Techn.* **2021**, *66*, 186.
- [10] R. Song, X. Cao, J. Xu, X. Zhou, X. Wang, N. Yuan, J. Ding, *Nanoscale* **2021**, *13*, 6174.
- [11] Y. Zheng, S. Chen, K. A. I. Zhang, J. Zhu, J. Xu, C. Zhang, T. Liu, *ACS Appl. Mater. Interfaces* **2021**, *13*, 13328.
- [12] Z. Duan, G. Han, H. Huo, Z. Lin, L. Ge, C. Du, Y. Gao, G. Yin, *ACS Sustain. Chem. Eng.* **2021**, *9*, 1264.
- [13] M. A. Ahsan, T. He, K. Eid, A. M. Abdullah, M. L. Curry, A. Du, A. R. Puente Santiago, L. Echegoyen, J. C. Noveron, *J. Am. Chem. Soc.* **2021**, *143*, 1203.
- [14] X. Zhang, X. Zhang, S. Zhao, Y. Q. Wang, X. Lin, Z. Q. Tian, P. K. Shen, S. P. Jiang, *Electrochim. Acta* **2021**, *370*, 137712.
- [15] Z. Xu, L. Li, X. Chen, G. Xiao, *ACS Appl. Energy Mater.* **2021**, *4*, 1954.
- [16] Z. Liu, M. Wang, X. Luo, S. Li, S. Li, Q. Zhou, W. Xu, R. Wu, *Appl. Surf. Sci.* **2021**, *544*, 148912.
- [17] Y. Wang, N. Xu, R. He, L. Peng, D. Cai, J. Qiao, *Appl. Catal. B- Environ.* **2021**, *285*, 119811.
- [18] H. Yu, H. Zhang, Z. Zhang, *ChemCatChem* **2020**, *13*, 397.
- [19] J. Yan, X. Zheng, C. Wei, Z. Sun, K. Zeng, L. Shen, J. Sun, M. H. Rummeli, R. Yang, *Carbon* **2021**, *171*, 320.
- [20] J.-J. Cai, Q.-Y. Zhou, X.-F. Gong, B. Liu, Y.-L. Zhang, Y.-K. Dai, D.-M. Gu, L. Zhao, X.-L. Sui, Z.-B. Wang, *Carbon* **2020**, *167*, 75.
- [21] J. Yang, F. Xiang, H. Guo, L. Wang, X. Niu, *Carbon* **2020**, *156*, 514.
- [22] D. Roy, S. Sarkar, K. Bhattacharjee, K. Panigrahi, B. K. Das, K. Sardar, S. Sarkar, K. K. Chattopadhyay, *Carbon* **2020**, *166*, 361.
- [23] T. Lu, X. Hu, J. He, R. Li, J. Gao, Q. Lv, Z. Yang, S. Cui, C. Huang, *Nano Energy* **2021**, *85*, 106024.
- [24] X. Li, Y. Zhao, Y. Yang, S. Gao, *Nano Energy* **2019**, *62*, 628.
- [25] J. Deng, L. Wang, F. Jin, Y. H. Hu, *J. Mater. Chem. A* **2021**, *9*, 11145.
- [26] X. Peng, L. Zhang, Z. Chen, L. Zhong, D. Zhao, X. Chi, X. Zhao, L. Li, X. Lu, K. Leng, C. Liu, W. Liu, W. Tang, K. P. Loh, *Adv. Mater.* **2019**, *31*, e1900341.
- [27] Z. Zhao, Z. Yuan, Z. Fang, J. Jian, J. Li, M. Yang, C. Mo, Y. Zhang, X. Hu, P. Li, S. Wang, W. Hong, Z. Zheng, G. Ouyang, X. Chen, D. Yu, *Adv. Sci.* **2018**, *5*, 1800760.
- [28] C. Wang, N.-H. Xie, Y. Zhang, Z. Huang, K. Xia, H. Wang, S. Guo, B.-Q. Xu, Y. Zhang, *Chem. Mater.* **2019**, *31*, 1023.

- [29] K. Kordek, L. Jiang, K. Fan, Z. Zhu, L. Xu, M. Al - Mamun, Y. Dou, S. Chen, P. Liu, H. Yin, P. Rutkowski, H. Zhao, *Adv. Energy Mater.* **2018**, *9*, 1802936.
- [30] B.-Q. Li, S.-Y. Zhang, B. Wang, Z.-J. Xia, C. Tang, Q. Zhang, *Energy Environ. Sci.* **2018**, *11*, 1723.
- [31] H. Zhang, M. Zhao, H. Liu, S. Shi, Z. Wang, B. Zhang, L. Song, J. Shang, Y. Yang, C. Ma, L. Zheng, Y. Han, W. Huang, *Nano Lett.* **2021**, *21*, 2255.
- [32] S. Zeng, F. Lyu, L. Sun, Y. Zhan, F.-X. Ma, J. Lu, Y. Y. Li, *Chem. Mater.* **2019**, *31*, 1646.
- [33] K. Wu, L. Zhang, Y. Yuan, L. Zhong, Z. Chen, X. Chi, H. Lu, Z. Chen, R. Zou, T. Li, C. Jiang, Y. Chen, X. Peng, J. Lu, *Adv. Mater.* **2020**, *32*, e2002292.
- [34] C. Guan, A. Sumboja, W. Zang, Y. Qian, H. Zhang, X. Liu, Z. Liu, D. Zhao, S. J. Pennycook, J. Wang, *Energy Storage Mater.* **2019**, *16*, 243.
